# Supplementary material for: Non-Endemic Leishmaniases Reported Globally in Humans between 2000 and 2021—A Comprehensive Review
Source: MDPI journal article supplement (doi:10.3390/pathogens11080921), 2022-08-16
Supplement: s1 [file s1]

**Supplementary Table S3.** References of identifications of species/complex by country in the Old and New Worlds.

| Country       | Species/Complex      |                                   |                                 |                               |                    |                 |                               |                  |                   |                         |
|---------------|----------------------|-----------------------------------|---------------------------------|-------------------------------|--------------------|-----------------|-------------------------------|------------------|-------------------|-------------------------|
|               | <i>L. aethiopica</i> | <i>L. braziliensis</i><br>complex | <i>L. guyanensis</i><br>complex | <i>L. donovani</i><br>complex | <i>L. lainsoni</i> | <i>L. major</i> | <i>L. mexicana</i><br>complex | <i>L. naiffi</i> | <i>L. tropica</i> | <i>L. (Viannia) sp.</i> |
| Afghanistan   |                      |                                   |                                 | (1)                           |                    | (1–5)           |                               |                  | (1–3,5–12)        |                         |
| Algeria       |                      |                                   |                                 | (6,7,13,14)                   |                    | (6,14–16)       |                               |                  |                   |                         |
| Argentina     |                      | (17)                              |                                 |                               |                    |                 |                               |                  |                   | (6)                     |
| Belize        |                      | (4,8,18–23)                       |                                 |                               |                    |                 | (1,21,24–26)                  |                  |                   | (1,6,27)                |
| Bolivia       |                      | (6,8,28–37)                       | (28,38)                         |                               |                    |                 | (1)                           |                  |                   | (1,6,27,39)             |
| Brazil        |                      | (6,8,28,37,40–42)                 | (6,43)                          | (14)                          | (6)                |                 |                               |                  |                   |                         |
| Burkina Faso  |                      |                                   |                                 |                               |                    | (7,28,44)       |                               |                  | (7)               |                         |
| Chad          |                      |                                   |                                 |                               |                    | (28,44,45)      |                               |                  |                   |                         |
| Chile         |                      | (46)                              |                                 |                               |                    |                 |                               |                  |                   |                         |
| Colombia      |                      | (5,28,47)                         |                                 |                               |                    |                 |                               |                  |                   | (39)                    |
| Costa Rica    |                      | (5,6,32,37,48,49)                 | (6,15,50–56)                    |                               |                    |                 | (47)                          |                  |                   | (6)                     |
| Croatia       |                      |                                   |                                 | (57)                          |                    |                 |                               |                  |                   |                         |
| Cyprus        |                      |                                   |                                 | (6,58)                        |                    |                 |                               |                  |                   |                         |
| Ecuador       |                      | (6,8,28,32,37,40)                 | (40,53,59)                      |                               |                    |                 |                               |                  |                   | (2,6)                   |
| Egypt         | (14)                 |                                   |                                 | (6,14)                        |                    |                 |                               |                  | (6,8)             |                         |
| Eritrea       | (60)                 |                                   |                                 |                               |                    |                 |                               |                  |                   |                         |
| Ethiopia      | (2,15,28,61)         |                                   |                                 |                               |                    |                 |                               |                  | (6)               |                         |
| France        |                      |                                   |                                 | (6,8,28)                      |                    |                 |                               |                  |                   |                         |
| French Guiana |                      | (5,6,8,15,29,32,37)               | (6,15,62,63)                    |                               |                    |                 | (6)                           | (6,15)           |                   |                         |
| Greece        |                      |                                   |                                 | (3,6,28)                      |                    |                 |                               |                  | (19,64)           |                         |
| Guatemala     |                      | (40,65)                           |                                 |                               |                    |                 | (8,28,66)                     |                  |                   |                         |
| Guyana        |                      |                                   |                                 |                               |                    |                 |                               |                  |                   | (67)                    |
| Iran          |                      |                                   |                                 |                               |                    | (6)             |                               |                  | (5,6)             |                         |
| Iraq          |                      |                                   |                                 |                               |                    | (1,5,28,68)     |                               |                  |                   |                         |
| Israel        |                      |                                   |                                 |                               |                    | (7,69–72)       |                               |                  | (28,40,69)        |                         |
| Italy         |                      |                                   |                                 | (5,6,8,14,73)                 |                    |                 |                               |                  |                   |                         |
| Jordan        |                      |                                   |                                 |                               |                    | (40)            |                               |                  | (19,28)           |                         |
| Lybia         |                      |                                   |                                 | (6)                           |                    | (28)            |                               |                  |                   |                         |

|              |                        |            |                         |                            |                |                     |
|--------------|------------------------|------------|-------------------------|----------------------------|----------------|---------------------|
| Mali         |                        |            |                         | (6,74)                     |                | (6)                 |
| Malta        |                        |            | (5,6,8)                 |                            |                |                     |
| Mauritania   |                        |            |                         | (6,7,40)                   |                |                     |
| Mexico       | (28)                   |            |                         |                            | (5,6,28,75–78) | (6)                 |
| Montenegro   |                        |            | (2)                     |                            |                |                     |
| Morocco      |                        |            | (6,79)                  | (6,7,15,28,32,38,40,45,80) |                | (6,28,81)           |
| Nicaragua    |                        | (82)       |                         |                            |                |                     |
| Pakistan     |                        |            | (1,6)                   | (1)                        |                | (1,3,6,83)          |
| Panama       |                        | (40,84,85) |                         |                            |                |                     |
| Paraguay     | (86)                   |            |                         |                            |                |                     |
| Peru         | (5,6,8,28,37,69,86–90) | (6,15,53)  |                         |                            | (5)            | (1,2,91,92)         |
| Tunisia      |                        |            | (6,7,38)                | (2,6,7,15,28,38,45,93)     |                | (6,28)              |
| Turkey       |                        |            | (6,67)                  |                            |                | (6)                 |
| Turkmenistan |                        |            |                         | (44,94)                    |                |                     |
| Saudi Arabia |                        |            |                         | (16,95,96)                 |                | (97)                |
| Senegal      |                        |            |                         | (6)                        |                |                     |
| Spain        |                        |            | (5,6,6,13,14,22,98–104) |                            |                |                     |
| Sri Lanka    |                        |            | (105)                   |                            |                |                     |
| Sudan        |                        |            |                         | (6,28)                     |                |                     |
| Suriname     |                        | (6)        |                         |                            | (106)          |                     |
| Syria        |                        |            |                         | (5,28,107,108)             |                | (2,6,28,93,107–112) |
| Venezuela    | (111,113)              |            |                         |                            |                |                     |
| Yemen        |                        |            |                         | (28)                       |                |                     |

---

## References

1. Wall, E.C.; Watson, J.; Armstrong, M.; Chiodini, P.L.; Lockwood, D.N. Epidemiology of Imported Cutaneous Leishmaniasis at the Hospital for Tropical Diseases, London, United Kingdom: Use of Polymerase Chain Reaction to Identify the Species. *Am J Trop Med Hyg* **2012**, *86*, 115–118, doi:10.4269/AJTMH.2012.10-0558.
2. Söbirk, S.K.; Inghammar, M.; Collin, M.; Davidsson, L. Imported Leishmaniasis in Sweden 1993-2016. *Epidemiol Infect* **2018**, *146*, 1267–1274, doi:10.1017/S0950268818001309.
3. Stark, D.; van Hal, S.; Lee, R.; Marriott, D.; Harkness, J. Leishmaniasis, an Emerging Imported Infection: Report of 20 Cases from Australia. *J Travel Med* **2008**, *15*, 351–354, doi:10.1111/J.1708-8305.2008.00223.X.
4. van Thiel, P.P.A.M.; Leenstra, T.; Kager, P.A.; de Vries, H.J.; van Vugt, M.; van der Meide, W.F.; Bart, A.; Zeegelaar, J.E.; van der Sluis, A.; Schallig, H.D.F.H.; et al. Miltefosine Treatment of *Leishmania major* Infection: An Observational Study Involving Dutch Military Personnel Returning from Northern Afghanistan. *Clin Infect Dis* **2010**, *50*, 80–83, doi:10.1086/648726.
5. Roberts, T.; Barratt, J.; Sandaradura, I.; Lee, R.; Harkness, J.; Marriott, D.; Ellis, J.; Stark, D. Molecular Epidemiology of Imported Cases of Leishmaniasis in Australia from 2008 to 2014. *PLoS One* **2015**, *10*, e0119212, doi:10.1371/JOURNAL.PONE.0119212.
6. Guery, R.; Walker, S.L.; Harms, G.; Neumayr, A.; van Thiel, P.; Gangneux, J.P.; Clerinx, J.; Söbirk, S.K.; Visser, L.; Lachaud, L.; et al. Clinical Diversity and Treatment Results in Tegumentary Leishmaniasis: A European Clinical Report in 459 Patients. *PLoS Negl Trop Dis* **2021**, *15*, e0009863, doi:10.1371/JOURNAL.PNTD.0009863.
7. Morizot, G.; Delgiudice, P.; Caumes, E.; Laffitte, E.; Marty, P.; Dupuy, A.; Sarfati, C.; Hadj-Rabia, S.; Darie, H.; le Guern, A.S.; et al. Healing Of Old World Cutaneous Leishmaniasis In Travelers Treated With Fluconazole: Drug Effect Or Spontaneous Evolution? *The American Journal of Tropical Medicine and Hygiene* **2007**, *76*, 48–52, doi:10.4269/AJTMH.2007.76.48.
8. Harms, G.; Schöniat, G.; Feldmeier, H. Leishmaniasis in Germany. *Emerg Infect Dis* **2003**, *9*, 872-875, doi:10.3201/EID0907.030023.
9. Flaig, M.J.; Rupec, J.; Ruzicka, T.; Rupec, R.A. [Topical Treatment of Persistent Cutaneous Leishmaniasis with Paromomycin]. *Hautarzt* **2007**, *58*, 689–692, doi:10.1007/S00105-007-1297-X.
10. Fathi, R.; Fathi, A. A Case of Cutaneous Leishmaniasis Found in Indiana. *Dermatol Online Journal* **2013**, *19*, 18982.
11. Ntais, P.; Christodoulou, V.; Tsigotakis, N.; Dokianakis, E.; Dedet, J.P.; Pratlong, F.; Antoniou, M. Will the Introduction of *Leishmania tropica* MON-58, in the Island of Crete, Lead to the Settlement and Spread of This Rare Zymodeme? *Acta Trop* **2014**, *132*, 125–130, doi:10.1016/J.ACTATROPICA.2014.01.003.
12. Islam, S. Rapidly Progressing Facial Leishmaniasis: Effective Treatment with Liposomal Amphotericin B and a Review of the Management of Old World Cutaneous Leishmaniasis. *Paediatr Int Child Health* **2018**, *38*, 158–161, doi:10.1080/20469047.2017.1296216.
13. Patel, T.A.; Scadding, G.K.; Phillips, D.E.; Lockwood, D.N. Case Report: Old World Mucosal Leishmaniasis: Report of Five Imported Cases to the Hospital for Tropical Diseases, London, United Kingdom. *Am J Trop Med Hyg* **2017**, *97*, 1116–1119, doi:10.4269/AJTMH.17-0162.
14. Neumayr, A.L.C.; Morizot, G.; Visser, L.G.; Lockwood, D.N.J.; Beck, B.R.; Schneider, S.; Bellaud, G.; Cordoliani, F.; Foulet, F.; Laffitte, E.A.; et al. Clinical Aspects and Management of Cutaneous Leishmaniasis in Rheumatoid Patients Treated with TNF- $\alpha$  Antagonists. *Travel Med Infect Dis* **2013**, *11*, 412–420, doi:10.1016/J.TMAID.2013.05.003.
15. Lavergne, R.A.; Iriart, X.; Martin-Blondel, G.; Chauvin, P.; Menard, S.; Fillaux, J.; Cassaing, S.; Roques-Malecaze, C.; Arnaud, S.; Valentin, A.; et al. Contribution of Molecular Diagnosis to the Management of Cutaneous Leishmaniasis in Travellers. *Clin Microbiol Infect* **2014**, *20*, doi:10.1111/1469-0691.12487.

16. Yang, Y.-T.; Zhang, M.; Gao, C.-H.; Shi, F.; Guan, L.-R.; Wang, J.-Y. [Detection and Species Identification of Two Imported Cases of Cutaneous Leishmaniasis]. *Zhongguo Ji Sheng Chong Xue Yu Ji Sheng Chong Bing Za Zhi* **2011**, *29*, 461–464.
17. Basile, G.; Cristofaro, G.; Locatello, L.G.; Vellere, I.; Piccica, M.; Bresci, S.; Maggiore, G.; Gallo, O.; Novelli, A.; di Muccio, T.; et al. Refractory Mucocutaneous Leishmaniasis Resolved with Combination Treatment Based on Intravenous Pentamidine, Oral Azole, Aerosolized Liposomal Amphotericin B, and Intralesional Meglumine Antimoniate. *Int J Infect Dis* **2020**, *97*, 204–207, doi:10.1016/J.IJID.2020.06.003.
18. Haider, S.; Boutross-Tadross, O.; Radhi, J.; Momar, N. Cutaneous Ulcer in a Man Returning from Central America. *CMAJ* **2003**, *4*, 591.
19. Loo, W.J.; Lishman, S.C.; Lockwood, D.N.J.; Todd, P.M. Case 2. Cutaneous Leishmaniasis, *Leishmania* Amastigotes. *Clin Exp Dermatol* **2003**, *28*, 567–568, doi:10.1046/J.1365-2230.2003.01360.X.
20. Clayton, R.; Grabczynska, S. Mucocutaneous Leishmaniasis Presenting as Facial Cellulitis. *J Laryngol Otol* **2005**, *119*, 567–569, doi:10.1258/0022215054352252.
21. Bailey, M.S. Cutaneous Leishmaniasis in British Troops Following Jungle Training in Belize. *Travel Med Infect Dis* **2011**, *9*, 253–254, doi:10.1016/J.TMAID.2011.07.001.
22. van der Snoek, E.M.; Couwenberg, S.M.; Stijnis, C.; Kortbeek, L.M.; Schadd, E.M. Two Cases of Cutaneous Leishmaniasis in Dutch Military Personnel Treated with Oral Miltefosine. *J R Army Med Corps* **2017**, *163*, 68–70, doi:10.1136/JRAMC-2015-000530.
23. Holmes, W.J.M.; Tehrani, H.; Liew, S. Cutaneous Leishmaniasis: A Diagnosis of Suspicion. *J Hand Surg Eur Vol* **2009**, *34*, 555–556, doi:10.1177/1753193408102773.
24. Demers, E.; Forrest, D.M.; Weichert, G.E. Cutaneous Leishmaniasis in a Returning Traveller. *CMAJ* **2013**, *185*, 681–683, doi:10.1503/CMAJ.120694.
25. Bailey, M.S.; Langman, G. Misdiagnosis of Cutaneous Leishmaniasis and Recurrence after Surgical Excision. *J R Army Med Corps* **2014**, *160*, 314–316, doi:10.1136/JRAMC-2013-000123.
26. Vinetz, J.M.; Soong, L. *Leishmania mexicana* Infection of the Eyelid in a Traveler to Belize. *Braz J Infect Dis* **2007**, *11*, 149–152, doi:10.1590/S1413-86702007000100030.
27. Lawn, S.D.; Yardley, V.; Vega-Lopez, F.; Watson, J.; Lockwood, D.N. New World Cutaneous Leishmaniasis in Returned Travellers: Treatment Failures Using Intravenous Sodium Stibogluconate. *Trans R Soc Trop Med Hyg* **2003**, *97*, 443–445, doi:10.1016/S0035-9203(03)90084-8.
28. di Muccio, T.; Scalone, A.; Bruno, A.; Marangi, M.; Grande, R.; Armignacco, O.; Gradoni, L.; Gramiccia, M. Epidemiology of Imported Leishmaniasis in Italy: Implications for a European Endemic Country. *PLoS One* **2015**, *10*, e0129418, doi:10.1371/JOURNAL.PONE.0129418.
29. Scope, A.; Trau, H.; Anders, G.; Barzilai, A.; Confino, Y.; Schwartz, E. Experience with New World Cutaneous Leishmaniasis in Travelers. *J Am Acad Dermatol* **2003**, *49*, 672–678, doi:10.1067/S0190-9622(03)01576-7.
30. Scope, A.; Trau, H.; Bakon, M.; Yarom, N.; Nasereddin, A.; Schwartz, E. Imported Mucosal Leishmaniasis in a Traveler. *Clin Infect Dis* **2003**, *37*, 83–87, doi:10.1086/377045.
31. Solomon, M.; Baum, S.; Barzilai, A.; Scope, A.; Trau, H.; Schwartz, E. Liposomal Amphotericin B in Comparison to Sodium Stibogluconate for Cutaneous Infection Due to *Leishmania braziliensis*. *J Am Acad Dermatol* **2007**, *56*, 612–616, doi:10.1016/j.jaad.2006.06.044.
32. Pérez-Ayala, A.; Norman, F.; Pérez-Molina, J.A.; Herrero, J.M.; Monge, B.; López-Vélez, R. Imported Leishmaniasis: A Heterogeneous Group of Diseases. *J Travel Med* **2009**, *16*, 395–401, doi:10.1111/J.1708-8305.2009.00341.X.
33. Mings, S.; Beck, J.C.; Davidson, C.; Ondo, A.L.; Shanler, S.D.; Berman, J. Cutaneous Leishmaniasis with Boggy Induration and Simultaneous Mucosal Disease. *Am J Trop Med Hyg* **2009**, *80*, 3–5, doi:10.4269/AJTMH.2009.80.3.

34. González, M.; Benito, F.; García, L.; Iglesias, A. [Mucocutaneous Leishmaniasis: An Imported Illness with ENT Repercussions]. *Acta Otorrinolaringol Esp* **2009**, *60*, 298–300, doi:10.1016/J.OTORRI.2009.01.006.
35. Solomon, M.; Sahar, N.; Pavlotzky, F.; Barzilai, A.; Jaffe, C.L.; Nasereddin, A.; Schwartz, E. Mucosal Leishmaniasis in Travelers with *Leishmania braziliensis* Complex Returning to Israel. *Emerg Infect Dis* **2019**, *25*, 642–648, doi:10.3201/EID2504.180239.
36. Murray, H.W.; Eiras, D.P.; Kirkman, L.A.; Chai, R.L.; Caplivski, D. Case Report: Mucosal Leishmaniasis in New York City. *Am J Trop Med Hyg* **2020**, *102*, 1319–1322, doi:10.4269/AJTMH.19-0861.
37. Harms, G.; Scherbaum, H.; Reiter-Owona, I.; Stich, A.; Richter, J. Treatment of Imported New World Cutaneous Leishmaniasis in Germany. *Int J Dermatol* **2011**, *50*, 1336–1342, doi:10.1111/J.1365-4632.2011.04987.X.
38. Poepl, W.; Oeser, C.; Grabmeier-Pfistershammer, K.; Walochnik, J.; Burgmann, H. Clinical Findings and Management of Imported Cutaneous Leishmaniasis: Report of 14 Cases from Austria. *Travel Med Infect Dis* **2013**, *11*, 90–94, doi:10.1016/J.TMAID.2013.03.002.
39. Lawn, S.D.; Whetham, J.; Chiodini, P.L.; Kanagalingam, J.; Watson, J.; Behrens, R.H.; Lockwood, D.N.J. New World Mucosal and Cutaneous Leishmaniasis: An Emerging Health Problem among British Travellers. *QJM* **2004**, *97*, 781–788, doi:10.1093/QJMED/HCH127.
40. Fernández-Arévalo, A.; Ballart, C.; Muñoz-Basagoiti, J.; Basarte, L.; Lobato, G.; Arnau, A.; Abras, A.; Tebar, S.; Llovet, T.; Lami, P.; et al. Autochthonous and Imported Tegumentary Leishmaniasis in Catalonia (Spain): Aetiological Evolution in the Last Four Decades and Usefulness of Different Typing Approaches Based on Biochemical, Molecular and Proteomic Markers. *Transbound Emerg Dis* **2021**, doi:10.1111/TBED.14107.
41. Schleucher, R.D.; Zanger, P.; Gaessler, M.; Knobloch, J. Successful Diagnosis and Treatment 50 Years after Exposure: Is Mucocutaneous Leishmaniasis Still a Neglected Differential Diagnosis? *J Travel Med* **2008**, *15*, 466–467, doi:10.1111/J.1708-8305.2008.00261.X.
42. Manfredi, R.; di Bari, M.A.; Calza, L.; Chiodo, F. American Cutaneous Leishmaniasis as a Rare Imported Disease in Europe: A Case Report Favourably Treated with Antimonial Derivatives. *Eur J Epidemiol* **2001**, *17*, 793–795, doi:10.1023/A:1015622016579.
43. Mulvaney, P.; Aram, G.; Maggiore, P.R.; Kutzner, H.; Carlson, J.A. Delay in Diagnosis: Trauma- and Coinfection-Related Cutaneous Leishmaniasis Because of *Leishmania guyanensis* Infection. *J Cutan Pathol* **2009**, *36*, 53–60, doi:10.1111/J.1600-0560.2007.00925.X.
44. Kuna, A.; Gajewski, M.; Bykowska, M.; Pietkiewicz, H.; Olszański, R.; Myjak, P. Imported Cutaneous Leishmaniasis: A 13-Year Experience of a Polish Tertiary Center. *Postepy Dermatol Alergol* **2019**, *36*, 104–111, doi:10.5114/ADA.2019.82830.
45. Calderaro, A.; Montecchini, S.; Rossi, S.; Gorrini, C.; Dell’Anna, M.L.; Piccolo, G.; Medici, M.C.; Arcangeletti, M.C.; Chezzi, C.; de Conto, F. A 22-Year Survey of Leishmaniasis Cases in a Tertiary-Care Hospital in an Endemic Setting. *Int J Environ Res Public Health* **2014**, *11*, 2834–2845, doi:10.3390/IJERPH110302834.
46. Navarrete-Dechent, C.; Cevallos, C.; Jercic, M.I.; Saldias-Fuentes, C.; González, S.; Labarca, J. [Liposomal Amphotericin B Treatment of Cutaneous Leishmaniasis Caused by *L. braziliensis*: An Imported Case Report]. *Rev Chilena Infectol* **2018**, *35*, 612–616, doi:10.4067/S0716-10182018000500612.
47. Montalvo, A.M.; Fraga, J.; Blanco, O.; González, D.; Monzote, L.; Soong, L.; Capó, V. Imported Leishmaniasis Cases in Cuba (2006–2016): What Have We Learned. *Trop Dis Travel Med Vaccines* **2018**, *4*, 7, doi:10.1186/S40794-018-0067-3.
48. Mateo, M.; Cruz, I.; Flores, M.D.; López-Vélez, R. [Slowly Progressing Skin Ulcers Following a Stay in Costa Rica]. *Enfermedades infecciosas y microbiología clínica* **2005**, *23*, 243–244, doi:10.1157/13073152.
49. ME, W.; LC, L. Photo Quiz. Healthy Student with a Papule. New World Cutaneous Leishmaniasis. *Clin Infect Dis* **2001**, *33*, 816–816, doi:10.1086/322714.
50. Galioto, P.; Fornaro, V. A Case of Mucocutaneous Leishmaniasis. *Ear Nose Throat J* **2002**, *81*, 46–48.

51. TF, H.; P, G.; WF, S.; DA, H.; R, M.; DJ, H. Photo Quiz. Lesion on the Arm of a Returning Traveler. Cutaneous Leishmaniasis. *Clin Infect Dis* **2001**, *33*, 815–815, doi:10.1086/322713.
52. Ismailjee, S.B.; Bernstein, J.M.; Burdette, S.D. Bite the Hand That Sprays You. *Skinmed* **2006**, *5*, 296–299, doi:10.1111/J.1540-9740.2006.05028.X.
53. Zaghi, D.; Panosian, C.; Gutierrez, M.A.; Gregson, A.; Taylor, E.; Ochoa, M.T. New World Cutaneous Leishmaniasis: Current Challenges in Diagnosis and Parenteral Treatment. *J Am Acad Dermatol* **2011**, *64*, 587–592, doi:10.1016/J.JAAD.2009.08.045.
54. Challener, D.; Abu Saleh, O. A Traveler's Unwanted Souvenir. *Am J Med* **2018**, *131*, e137–e138, doi:10.1016/J.AMJMED.2017.09.033.
55. Mann, S.; Phupitakphol, T.; Davis, B.; Newman, S.; Suarez, J.A.; Henao-Martínez, A.; Franco-Paredes, C. Case Report: Cutaneous Leishmaniasis Due to *Leishmania (Viannia) panamensis* in Two Travelers Successfully Treated with Miltefosine. *Am J Trop Med Hyg* **2020**, *103*, 1081–1084, doi:10.4269/AJTMH.20-0086.
56. Abadir, A.; Patel, A.; Haider, S. Systemic Therapy of New World Cutaneous Leishmaniasis: A Case Report and Review Article. *Can J Infect Dis Med Microbiol* **2010**, *21*, e79–e83, doi:10.1155/2010/768645.
57. Leitner, V.; Weingast, J.; Harmankaya, K.; Walochnik, J.; Pehamberger, H.; Petzelbauer, P.; Auer, H.; Binder, M. Leishmaniasis in the Tongue of an Immunocompetent Man. *Am J Trop Med Hyg* **2010**, *82*, 597–599, doi:10.4269/AJTMH.2010.09-0698.
58. Poepl, W.; Walochnik, J.; Pustelnik, T.; Auer, H.; Mooseder, G. Cutaneous Leishmaniasis after Travel to Cyprus and Successful Treatment with Miltefosine. *Am J Trop Med Hyg* **2011**, *84*, 562–565, doi:10.4269/AJTMH.2011.10-0645.
59. Ondriska, F.; Bukovinova, P.; Votypka, J.; Nohynkova, E.; Boldis, V. Imported New World Cutaneous Leishmaniasis in a Traveller from Slovakia. *Bratisl Lek Listy* **2015**, *116*, 203–206, doi:10.4149/BLL\_2015\_040.
60. Zanger, P.; Kötter, I.; Raible, A.; Gelanew, T.; Schönian, G.; Kremsner, P.G. Case Report: Successful Treatment of Cutaneous Leishmaniasis Caused by *Leishmania aethiopica* with Liposomal Amphotericin B in an Immunocompromised Traveler Returning from Eritrea. *Am J Trop Med Hyg* **2011**, *84*, 692–694, doi:10.4269/AJTMH.2011.10-0712.
61. Gilkey, T.; Ulman, C.A.; McGwire, B.; Plaza, J.A. Cutaneous *Leishmania aethiopica* Diagnosed in the United States. *Dermatol Online J* **2021**, *27*, doi:10.5070/D327854705.
62. Vanbrabant, P.; van den Broucke, S.; Soentjens, P. Cutaneous Ulcer after a Stay in the Tropics. *Neth J Med* **2015**, *73*, 44.
63. Goodrich, E.S.; Sears, S.C.; Sorrells, T.; Radike, J.K.; Miladi, A.; Glass, J.S. A Case of Cutaneous Leishmaniasis *guyanensis* Mimicking Otitis Externa. *Mil Med* **2017**, *182*, e1969–e1972, doi:10.7205/MILMED-D-17-00054.
64. Berens-Riha, N.; Fleischmann, E.; Pratlong, F.; Bretzel, G.; von Sonnenburg, F.; Löscher, T. Cutaneous Leishmaniasis (*Leishmania tropica*) in a German Tourist after Travel to Greece. *J Travel Med* **2009**, *16*, 220–222, doi:10.1111/J.1708-8305.2008.00291.X.
65. Bormann, G.; William, T.; Schulz, A.; Marsch, W.; Gaber, G. [American Cutaneous Leishmaniasis: Special Features in Diagnosis and Therapy]. *Dtsch Med Wochenschr* **2003**, *128*, 2065–2068, doi:10.1055/S-2003-42703.
66. Blaylock, J.M.; Wortmann, G.W. A Case Report and Literature Review of “Chiclero's Ulcer.” *Travel Med Infect Dis* **2012**, *10*, 275–278, doi:10.1016/J.TMAID.2012.08.005.
67. Guery, R.; Henry, B.; Martin-Blondel, G.; Rouzaud, C.; Cordoliani, F.; Harms, G.; Gangneux, J.P.; Foulet, F.; Bourrat, E.; Baccard, M.; et al. Liposomal Amphotericin B in Travelers with Cutaneous and Muco-Cutaneous Leishmaniasis: Not a Panacea. *PLoS Negl Trop Dis* **2017**, *11*, doi:10.1371/JOURNAL.PNTD.0006094.
68. Update: Cutaneous Leishmaniasis in U.S. Military Personnel --- Southwest/Central Asia, 2002--2004 Available online: <https://www.cdc.gov/mmwr/preview/mmwrhtml/mm5312a4.htm> (accessed on 13 July 2022).

69. Taxy, J.B.; Goldin, H.M.; Dickie, S.; Cibull, T. Cutaneous Leishmaniasis: Contribution of Routine Histopathology in Unexpected Encounters. *Am J Surg Pathol* **2019**, *43*, 195–200, doi:10.1097/PAS.0000000000001177.
70. Mongkolrattanothai, K.; Nadipuram, S.M.; Krakowski, A.C.; Stone, M.M.; Krogstad, P.; Lehman, D. Leishmaniasis Gone Viral: Social Media and an Outbreak of Cutaneous Leishmaniasis. *Pediatr Dermatol* **2016**, *33*, e276–e277, doi:10.1111/PDE.12910.
71. Basnett, A.; Nguyen, T.A.; Cannavino, C.; Krakowski, A.C. Ablative Fractional Laser Resurfacing with Topical Paromomycin as Adjunctive Treatment for a Recalcitrant Cutaneous Leishmaniasis Wound. *Lasers Surg Med* **2015**, *47*, 788–791, doi:10.1002/LSM.22426.
72. Kuilder, J.S.; Wismans, P.J.; Baerveldt, E.M.; van Hellemond, J.J.; de Mendonça Melo, M.; van Genderen, P.J.J. Leishmania Major Cutaneous Leishmaniasis in 3 Travelers Returning from Israel to the Netherlands. *Emerg Infect Dis* **2016**, *22*, 2022–2024, doi:10.3201/EID2211.161154.
73. Newlove, T.; Robinson, M.; Meehan, S.A.; Pomerantz, R. Old World Cutaneous Leishmaniasis. *Dermatol Online J* **2012**, *18*, 32, doi:10.18295/squmj.9.2021.133.
74. Kelly, P.; Baudry, T.; Peyron, F. Imported Cutaneous Leishmaniasis in a Short-Term Traveler Returning from Central Mali - The Role of PCR. *Travel Med Infect Dis* **2012**, *10*, 97–100, doi:10.1016/J.TMAID.2012.01.004.
75. Spinicci, M.; Zammarchi, L.; Gramiccia, M.; di Muccio, T.; Bartolozzi, D.; Corsi, P.; Trotta, M.; Bartoloni, A. Effective Meglumine Antimoniate Intralesional Therapy for Chiclero's Ulcer Refractory to Systemic Liposomal Amphotericin B. *J Travel Med* **2021**, *28*, 1–2, doi:10.1093/JTM/TAAA169.
76. Eldin, C.; L'Ollivier, C.; Ranque, S.; Gautret, P.; Parola, P. "Chiclero's Ulcer" Due to *Leishmania mexicana* in Travelers Returning from Central America: A Case Report and Review of the Literature. *Pathogens* **2021**, *10*, doi:10.3390/PATHOGENS10091112.
77. Tsai, P.H.; Chen, Y.T.; Liao, J.Y.; Huang, M.H.; Hsu, H.M.; Yeong, E.K.; Hung, C.C. Molecular Diagnosis and Therapy for Cutaneous Leishmaniasis of a Returned Traveler from Mexico. *J Microbiol Immunol Infect* **2021**, *54*, 1154–1158, doi:10.1016/J.JMII.2020.07.007.
78. Cohen, J.; Saavedra, A.; Sax, P.; Lipworth, A. Pink Plaque on the Arm of a Man after a Trip to Mexico: Cutaneous Leishmaniasis. *Dermatol Online J* **2015**, *21*, 13030.
79. van Hees, C.; van Hellemond, J.; den Boer, M. [A Boy with an Unexpected Souvenir from Morocco]. *Nederlands Tijdschrift voor Geneeskunde* **2014**, *158*, A7606.
80. Nasri, J.; Cajacob, L.; Wirz, E.; Ruf, M.T.; Blum, J.; Mühleisen, B.; Navarini, A.A.; Maul, L. v. Pre-Ulcerative Leishmaniasis Mimicking Chilblains in a Returning Traveller from Southern Europe. *J Eur Acad Dermatol Venereol* **2021**, *35*, e503–e505, doi:10.1111/JDV.17233.
81. Knöpfel, N.; Noguera-Morel, L.; Azorin, D.; Sanz, F.; Torrelo, A.; Hernández-Martín, A. Cutaneous *Leishmania tropica* in Children: Report of Three Imported Cases Successfully Treated with Liposomal Amphotericin B. *J Eur Acad Dermatol Venereol* **2018**, *32*, e8–e10, doi:10.1111/JDV.14434.
82. EM, T.; JR, M.; A, V. Photo Quiz: A 24-Year-Old Traveler with an Insect Bite and Rash. *Clin Infect Dis* **2015**, *61*, 1314, doi:10.1093/CID/CIV359.
83. Kitano, H.; Sanjoba, C.; Goto, Y.; Iwamoto, K.; Kitagawa, H.; Nomura, T.; Omori, K.; Shigemoto, N.; Hide, M.; Matsumoto, Y.; et al. Complicated Cutaneous Leishmaniasis Caused by an Imported Case of *Leishmania tropica* in Japan: A Case Report. *Trop Med Health* **2021**, *49*, doi:10.1186/S41182-021-00312-4.
84. Barry, M.A.; Koshelev, M. v.; Sun, G.S.; Grekin, S.J.; Stager, C.E.; Diwan, A.H.; Wasko, C.A.; Murray, K.O.; Woc-Colburn, L. Cutaneous Leishmaniasis in Cuban Immigrants to Texas Who Traveled through the Darién Jungle, Panama. *Am J Trop Med Hyg* **2014**, *91*, 345–347, doi:10.4269/AJTMH.14-0124.
85. Crowe, A.; Slavin, J.; Stark, D.; Aboltins, C. A Case of Imported *Leishmania infantum* Cutaneous Leishmaniasis; an Unusual Presentation Occurring 19 Years after Travel. *BMC Infect Dis* **2014**, *14*, 597, doi:10.1186/S12879-014-0597-X.

86. Eichner, S.; Thoma-Uszynski, S.; Herrgott, I.; Sebald, H.; Debus, A.; Tsianakas, A.; Ehrchen, J.; Harms, G.; Simon, M.; Sunderkötter, C.; et al. Clinical Complexity of *Leishmania (Viannia) braziliensis* Infections amongst Travelers. *Eur J Dermatol* **2013**, *23*, 218–223, doi:10.1684/EJD.2013.1934.
87. Schönian, G.; Nasereddin, A.; Dinse, N.; Schweynoch, C.; Schallig, H.D.F.H.; Presber, W.; Jaffe, C.L. PCR Diagnosis and Characterization of *Leishmania* in Local and Imported Clinical Samples. *Diagn Microbiol Infect Dis* **2003**, *47*, 349–358, doi:10.1016/S0732-8893(03)00093-2.
88. Lange, C.G.; Salata, R.A. [Cutaneous Leishmaniasis]. *Med Klin (Munich)* **2001**, *96*, 561–562, doi:10.1007/PL00002242.
89. Breclj, M.; Pikelj, F.; Gubenšek, F.; Anderluh, G. Polymerase Chain Reaction as a Diagnostic Tool for Detecting *Leishmania*. *Infection* **2000**, *28*, 111–113, doi:10.1007/S150100050057.
90. Crone, C.G.; Helleberg, M. Cutaneous Leishmaniasis with Secondary Mucosal Disease in a Traveller Due to *Leishmania (Viannia) braziliensis*. *J Travel Med* **2020**, *27*, doi:10.1093/JTM/TAZ093.
91. Clegg, A.; Hall, C.; Lockwood, D. An Ulcer That Will Not Heal. *BMJ* **2018**, *362*, doi:10.1136/BMJ.K3042.
92. Raghunath, R.S.; Yong, A.S.W.; Igali, L.; Tan, E.; Lockwood, D. Cutaneous Leishmaniasis in a Returning UK Traveller. *Postgrad Med J* **2014**, *90*, 540–541, doi:10.1136/POSTGRADMEDJ-2014-132620.
93. Michelerio, A.; Barruscotti, S.; Bossi, G.; Brazzelli, V. Pediatric Old World Cutaneous Leishmaniasis Treated with Oral Fluconazole: A Case Series. *Pediatr Dermatol* **2018**, *35*, 384–387, doi:10.1111/PDE.13493.
94. Larréché, S.; Launay, G.; Weibel Galluzzo, C.; Bousquet, A.; Eperon, G.; Pilo, J.E.; Ravel, C.; Chappuis, F.; Dupin, M.; Mérens, A. Cluster of Zoonotic Cutaneous Leishmaniasis (*Leishmania major*) in European Travelers Returning from Turkmenistan. *J Travel Med* **2013**, *20*, 400–402, doi:10.1111/JTM.12065.
95. Zhang, M.; Liu, F.; Liu, H.B.; Hu, W.X.; Sang, H. Imported Cutaneous Leishmaniasis Caused by *Leishmania major* in a Chinese Laborer Who Worked in Saudi Arabia. *An Bras Dermatol* **2016**, *91*, 365–367, doi:10.1590/ABD1806-4841.20163820.
96. Khan, M.A.A.; Chowdhury, R.; Nath, R.; Hansen, S.; Nath, P.; Maruf, S.; Abd El Wahed, A.; Mondal, D. Imported Cutaneous Leishmaniasis: Molecular Investigation Unveils *Leishmania major* in Bangladesh. *Parasit Vectors* **2019**, *12*, doi:10.1186/S13071-019-3771-6.
97. Rahman, H.; Razzak, M.; Chanda, B.; Bhaskar, K.; Mondal, D. Cutaneous Leishmaniasis in an Immigrant Saudi Worker: A Case Report. *Journal of Health, Population and Nutrition* **2014**, *32*, 372–376.
98. Schwartz, T.; Jensenius, M.; Blomberg, B.; Fladeby, C.; Mæland, A.; Pettersen, F.O. Imported Visceral Leishmaniasis and Immunosuppression in Seven Norwegian Patients. *Trop Dis Travel Med Vaccines* **2019**, *5*, 16, doi:10.1186/S40794-019-0092-X.
99. Suqati, A.A.; Pudzuhn, A.; Hofmann, V.M. Mucocutaneous Leishmaniasis: Case Report and Literature Review of a Rare Endonasal Infection. *Pan Afr Med J* **2020**, *36*, 1–4, doi:10.11604/PAMJ.2020.36.292.24543.
100. Menten, K.; Soentjens, P.; Caenepeel, P.; Lemkens, P. Mucocutaneous Leishmaniasis of the Nose: A Case Report. *B-ENT* **2015**, *11*, 77–80.
101. Ehler, N.; Seilmaier, M.; Guggemos, W.; Löscher, T.; Meurer, A.; Wendtner, C.M. [Severe Oral Mucositis in a Patient with HIV Infection]. *Dtsch Med Wochenschr* **2013**, *138*, 1601–1605, doi:10.1055/S-0033-1343296.
102. Terhorst, D.; Blume-Peytavi, U.; Schönian, G.; Schewe, C.; Haas, N.; Burbach, G.J. Leishmaniasis: A Reminder in the Face of Forgotten Travel. *J Pediatr* **2012**, *161*, 966, doi:10.1016/J.JPEDI.2012.05.013.
103. Darné, S.; Sinclair, S.A. A Sandfly in Surrey? A Case of Cutaneous Leishmaniasis in the United Kingdom without History of Recent Travel to an Endemic Area. *Clin Exp Dermatol* **2006**, *31*, 155–156, doi:10.1111/J.1365-2230.2005.01984.X.
104. Siah, T.; Lavender, T.; Charlton, F.; Wahie, S.; Schwab, U. An Unusual Erysipelas-like Presentation. *Dermatol Online Journal* **2014**, *20*, 21255.

105. Ito, K.; Takahara, M.; Ito, M.; Oshiro, M.; Takahashi, K.; Uezato, H.; Imafuku, S. An Imported Case of Cutaneous Leishmaniasis Caused by *Leishmania (Leishmania) donovani* in Japan. *J Dermatol* **2014**, *41*, 926–928, doi:10.1111/1346-8138.12609.
106. van der Snoek, E.M.; Lammers, A.M.; Kortbeek, L.M.; Roelfsema, J.H.; Bart, A.; Jaspers, C.A.J.J. Spontaneous Cure of American Cutaneous Leishmaniasis Due to *Leishmania naiffi* in Two Dutch Infantry Soldiers. *Clin Exp Dermatol* **2009**, *34*, doi:10.1111/J.1365-2230.2009.03658.X.
107. Saroufim, M.; Charafeddine, K.; Issa, G.; Khalifeh, H.; Habib, R.H.; Berry, A.; Ghosn, N.; Rady, A.; Khalifeh, I. Ongoing Epidemic of Cutaneous Leishmaniasis among Syrian Refugees, Lebanon. *Emerg Infect Dis* **2014**, *20*, 1712–1715, doi:10.3201/EID2010.140288.
108. Hijawi, K.J.F.; Hijawi, N.S.; Ibbini, J.H. Detection, Genotyping, and Phylogenetic Analysis of *Leishmania* Isolates Collected from Infected Jordanian Residents and Syrian Refugees Who Suffered from Cutaneous Leishmaniasis. *Parasitol Res* **2019**, *118*, 793–805, doi:10.1007/S00436-019-06222-Z.
109. Talas, J.; Mielcarek, K.; Wu, J.; Brunner, M.; Steinhoff, M.; Zouboulis, C.C. [Cutaneous Leishmaniasis in Germany-Still a Travel-Related Disease]. *Der Hautarzt; Zeitschrift fur Dermatologie, Venerologie, und verwandte Gebiete* **2022**, *73*, 146–151, doi:10.1007/S00105-021-04890-6.
110. van Kesteren, L.; Maniewski, U.; Bottieau, E.; Cnops, L.; Huits, R. Cutaneous Leishmaniasis in Syrian Refugee Children: A Case Series. *Pediatr Infect Dis J* **2020**, *39*, E154–E156, doi:10.1097/INF.0000000000002676.
111. Imai, K.; Tarumoto, N.; Amo, K.; Takahashi, M.; Sakamoto, N.; Kosaka, A.; Kato, Y.; Mikita, K.; Sakai, J.; Murakami, T.; et al. Non-Invasive Diagnosis of Cutaneous Leishmaniasis by the Direct Boil Loop-Mediated Isothermal Amplification Method and MinION™ Nanopore Sequencing. *Parasitol Int* **2018**, *67*, 34–37, doi:10.1016/J.PARINT.2017.03.001.
112. Bradshaw, S.; Litvinov, I. v. Dermal Leishmaniasis in a 25-Year-Old Syrian Refugee. *CMAJ* **2017**, *189*, E1397, doi:10.1503/CMAJ.170844.
113. Downing, C.P.; Woc-Colburn, L.; Tying, S.K. Nasal Erythema and Crusting after a Trip to the Venezuelan Rainforest. *JAMA* **2014**, *312*, 1250–1251, doi:10.1001/JAMA.2014.3610.
